# Supplementary material
Source: publisher figshare collection journal article supplement (https://acs.figshare.com/ndownloader/files/14534900)
Supplement: Supplementary file 1 [file 14534900]

# Supporting Information

## **Ultrasensitive and Highly Compressible Piezoresistive Sensor Based on Polyurethane Sponge Coated with Cracked Cellulose Nanofibril/Silver Nanowire Layer**

Shuaidi Zhang,<sup>1</sup> Hu Liu,<sup>1,2\*</sup> Shuaiyuan Yang,<sup>1</sup> Xianzhang, Shi,<sup>1</sup> Dianbo Zhang,<sup>1</sup> Chongxin Shan,<sup>3</sup>  
Liwei Mi,<sup>4</sup> Chuntai Liu,<sup>1</sup> Changyu Shen<sup>1</sup> and Zhanhu Guo<sup>2</sup>

<sup>1</sup>Key Laboratory of Materials Processing and Mold (Zhengzhou University), Ministry of Education; National Engineering Research Center for Advanced Polymer Processing Technology, Zhengzhou University, Zhengzhou, 450002, China

<sup>2</sup>Integrated Composites Laboratory (ICL), Department of Chemical & Biomolecular Engineering, University of Tennessee, Knoxville, TN 37996 USA

<sup>3</sup>School of Physics and Engineering, Zhengzhou University, Zhengzhou, Henan 450052 China

<sup>4</sup>Center for Advanced Materials Research, Zhongyuan University of Technology, Zhengzhou, Henan 451191 China

*\*: Correspondence authors*

E-mail: [liuhu@zzu.edu.cn](mailto:liuhu@zzu.edu.cn) (H. L.)

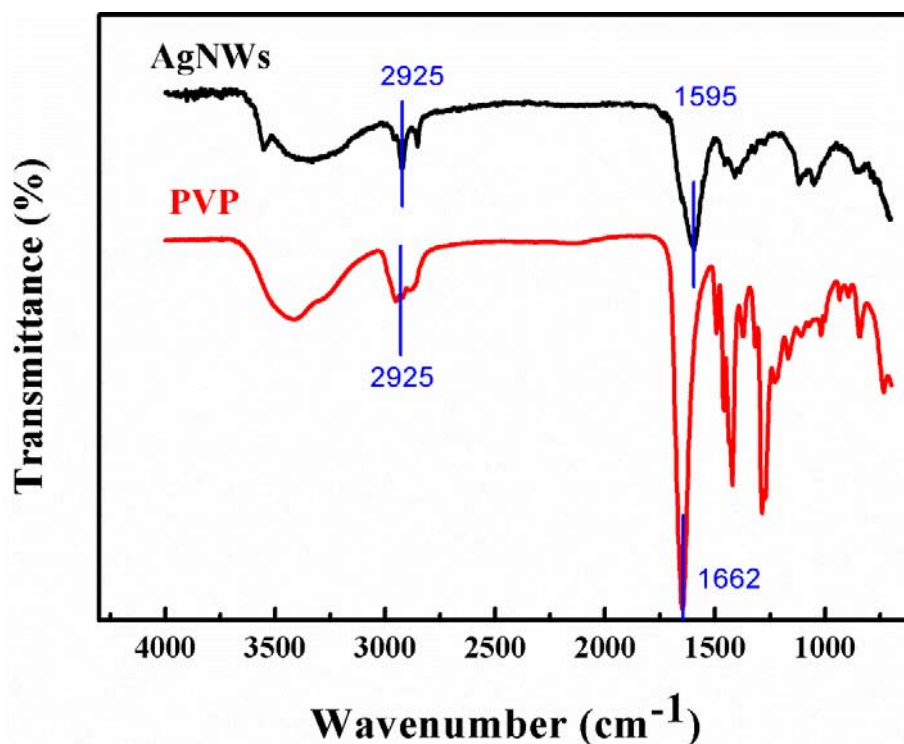

**Fig. S1** FT-IR spectrum of as-prepared AgNWs and PVP

It can be seen from the Fig. S1 that the spectra of AgNWs and PVP are similar, indicating the presence of PVP on the surface of the AgNWs. The FTIR spectrum of the PVP presents three bands at  $2925\text{ cm}^{-1}$ ,  $2890\text{ cm}^{-1}$  and  $1662\text{ cm}^{-1}$ , corresponding to the symmetric and asymmetric stretching vibration peaks of  $\text{-CH}_2\text{-}$  and the stretching vibration absorption peaks of  $\text{C=O}$  and  $\text{C-N}$ , respectively. Due to the interaction between the AgNWs and PVP, the  $\text{C=O}$  stretching vibration absorption peak of the AgNWs moves to the low wave number, which indicates that the Ag atoms on the surface of the AgNWs interact with the oxygen atoms on the surface of PVP. In addition, the stretching vibration peak of  $\text{-CH}_2\text{-}$  of AgNWs is significantly enhanced relative to PVP, which proves that the molecular chain of PVP may be adsorbed on the (100) crystal plane of the Ag crystal, causing the crystal to grow on the (111) crystal plane.

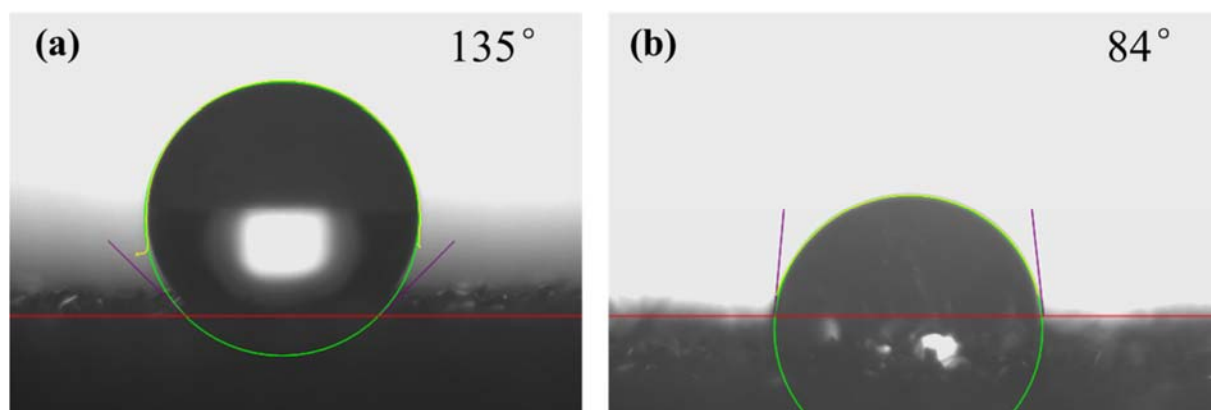

**Fig. S2** Water contact angle (WCA) of (a) original PU sponge and (b) PDA treated PU sponge.

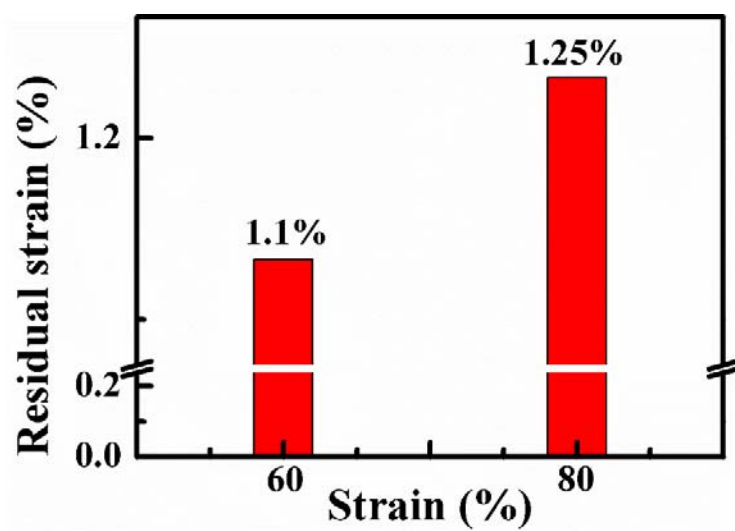

**Fig. S3** Residual strain of the PU sponge after 60% and 80% compression strain.

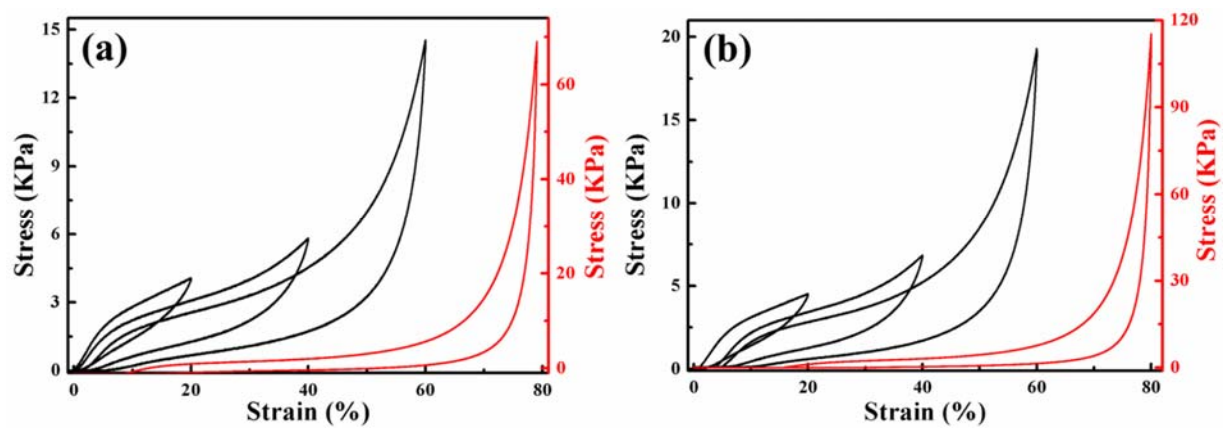

**Fig. S4** Compressive stress-strain curves of (a) CA@PU<sub>6</sub> sponge and (b) CA@PU<sub>12</sub> sponge under different strain
